# Supplementary material for: Cellular heterogeneity in the 16HBE14o − airway epithelial line impacts biological readouts
Source: PubMed Central journal article supplement (PMC10238858; doi:10.14814/phy2.15700), 2023-06-03
Supplement: PHY2-11-e15700-s002.pdf [file PHY2-11-e15700-s002.pdf]

## Cellular heterogeneity in the 16HBE14o- airway epithelial line impacts biological readouts

Jenny L. Kerschner, Alekh Paranjapye, and Ann Harris

### Data Supplement

#### Figure Legends

Figure S1: CFTR protein analysis of 16HBE14o- CFTR<sup>high</sup> and CFTR<sup>low</sup> clones.

Figure S2: Open chromatin profiles of individual CFTR<sup>high</sup> and CFTR<sup>low</sup> clones.

Table S1: Oligonucleotides

Table S2: DEGs of CFTR-high vs CFTR-low with a fold change  $\geq 1.5$  or  $\leq -1.5$ , an adjusted p-value  $\leq 0.01$ , and a basemean  $>30$

Table S3: DAVID GO term analysis for CFTR-high DEGs, p-value  $\leq 0.01$

Table S4: DAVID GO term analysis for CFTR-low DEGs, p-value  $\leq 0.01$

## Supplementary Figure Legends

**Figure S1: CFTR analysis of 16HBE14o<sup>-</sup> CFTR<sup>high</sup> and CFTR<sup>low</sup> clones.** Representative western blot showing CFTR protein levels in 16HBE14o<sup>-</sup> cells, and 12 clones and  $\beta$ -tubulin loading control with the 4 chosen for subsequent analyses shown in brown (CFTR<sup>high</sup>) or blue (CFTR<sup>low</sup>).

**Figure S2: Open chromatin profiles of individual CFTR<sup>high</sup> and CFTR<sup>low</sup> clones.** Open chromatin mapping of 16HBE14o<sup>-</sup> CFTR<sup>high</sup> (clones 4 and 7, brown) and CFTR<sup>low</sup> (clones 3 and 12, blue) cells, mapped to the hg19 genome build. Clonal cells were collected from two non-sequential passages. Sites where chromatin is more open in CFTR<sup>high</sup> or CFTR<sup>low</sup> clones are marked by arrows. At the top for comparison are shown Calu3 ATAC-seq and RNA-polII ChIP-seq (in dark grey) and 16HBE14o<sup>-</sup> WT ATAC-seq RNA-polII ChIP-seq (in black) (GSE132808).

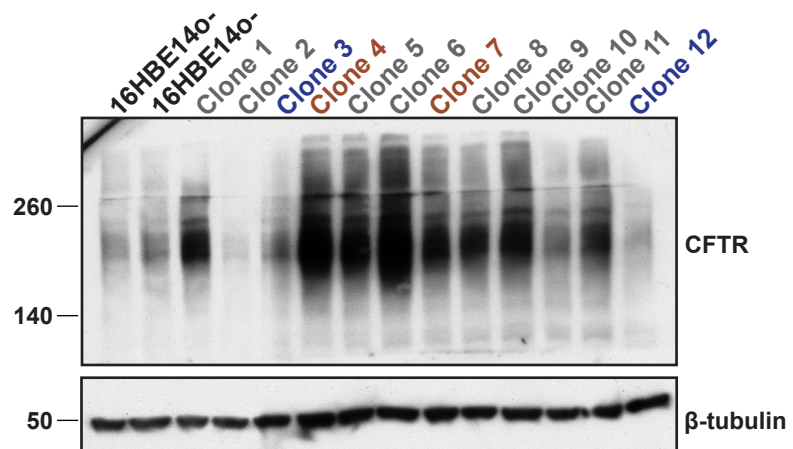

Figure S1

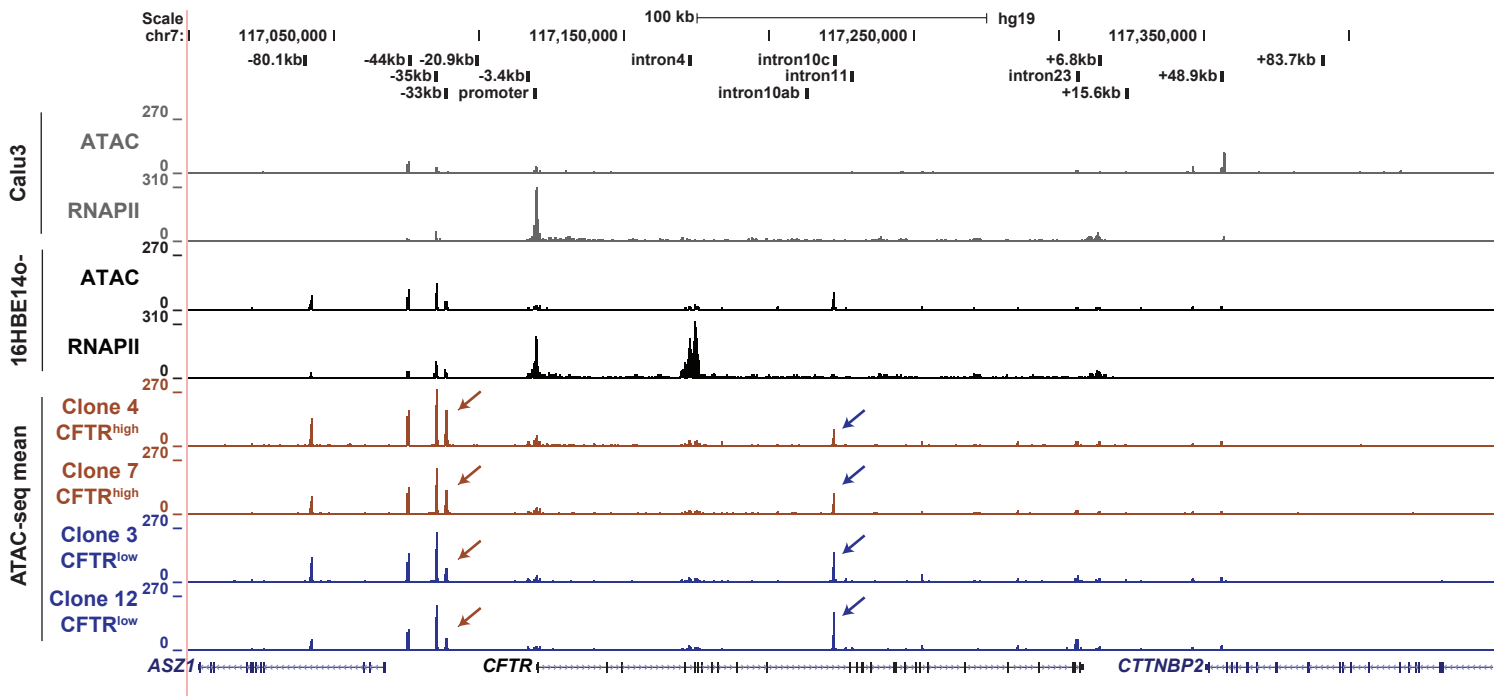

Figure S2

**Table S1: Oligonucleotides**

| TaqMan Assay |                                                                                                                                  |  |
|--------------|----------------------------------------------------------------------------------------------------------------------------------|--|
| Gene         | Sequence (5'>3')                                                                                                                 |  |
| CFTR         | AGCTGTCAAGCCGTGTTCTAGATA<br>ATGAGGAGTGCCACTTGCAAA<br>/56-FAM/CACACGAAA/ZEN/TGTGCCAATGCAAGTCCTT/3IABkFQ/<br>AAGTGGATCGAGACATGTAAG |  |
| B2M          | GCAAGCAAGCAGAATTGGA<br>/56-JOEN/TCATGGAGG/ZEN/TTGAAGATGCCGCA/3IABkFQ/                                                            |  |

  

| 4C-seq                      |                                                |                                                        |
|-----------------------------|------------------------------------------------|--------------------------------------------------------|
| Viewpoint (enzyme combo.)   | Reading Primer (5'>3')                         | Non-reading Primer (5'>3')                             |
| DHS -20.9 kb (NlaIII/DpnII) | tacacgacgctcttccgatctTTAACAAAGTTTAGGTAAATGACCA | actggagttcagacgtgtgctcttccgatctCAAAGTGAGCTATTTGTTTTCTC |
| DHS +48.9 kb (NlaIII/DpnII) | tacacgacgctcttccgatctTACACGACGCTCTCCGATCT      | actggagttcagacgtgtgctcttccgatctGAGTGAGCTTGAAGCCATG     |
